# Supplementary material for: A Comparative Study of Five Apple Cultivars Linking Biochemical Changes at Different Developmental Stages with Storage Textural Quality
Source: MDPI journal article supplement (doi:10.3390/horticulturae10040379), 2024-04-09

**Figure S2b.** Correlation plot between 70 DAFB sugar composition (rhamnose [Rha], fucose [Fuc], arabinose [Ara], xylose [Xyl], mannose [Man], galactose [Gal], glucose [Glu], and uronic acid [UA]) of cell wall material (AIR) and fractions (Water, CDTA, and Sodium Carbonate [Na<sub>2</sub>CO<sub>3</sub>]), cell wall enzyme activities ( $\beta$ -D-Galactosidase [BGAL],  $\alpha$ -L-Arabinofuranosidase [AFAS] and Pectin Methylesterase [PME] Activity in buffer soluble [BS] and salt soluble [SS] extracts on protein basis (p), and textural parameters at harvest (M1 is maximum hardness in Region 1; M2 is maximum hardness in Region 2, A2 is average hardness in Region 2; E2 is integrity of cortex in Region 2; and Cn is Crispness in Region 2) and upon 20-week storage (M1S is maximum hardness in Region 1; M2S is maximum hardness in Region 2, A2S is average hardness in Region 2; E2S is integrity of cortex in Region 2; and CnS is Crispness in Region 2). Significant Pearson correlation co-efficient values at  $p \leq 0.05$  are presented in bold font.

### Pearson correlation heat map scale

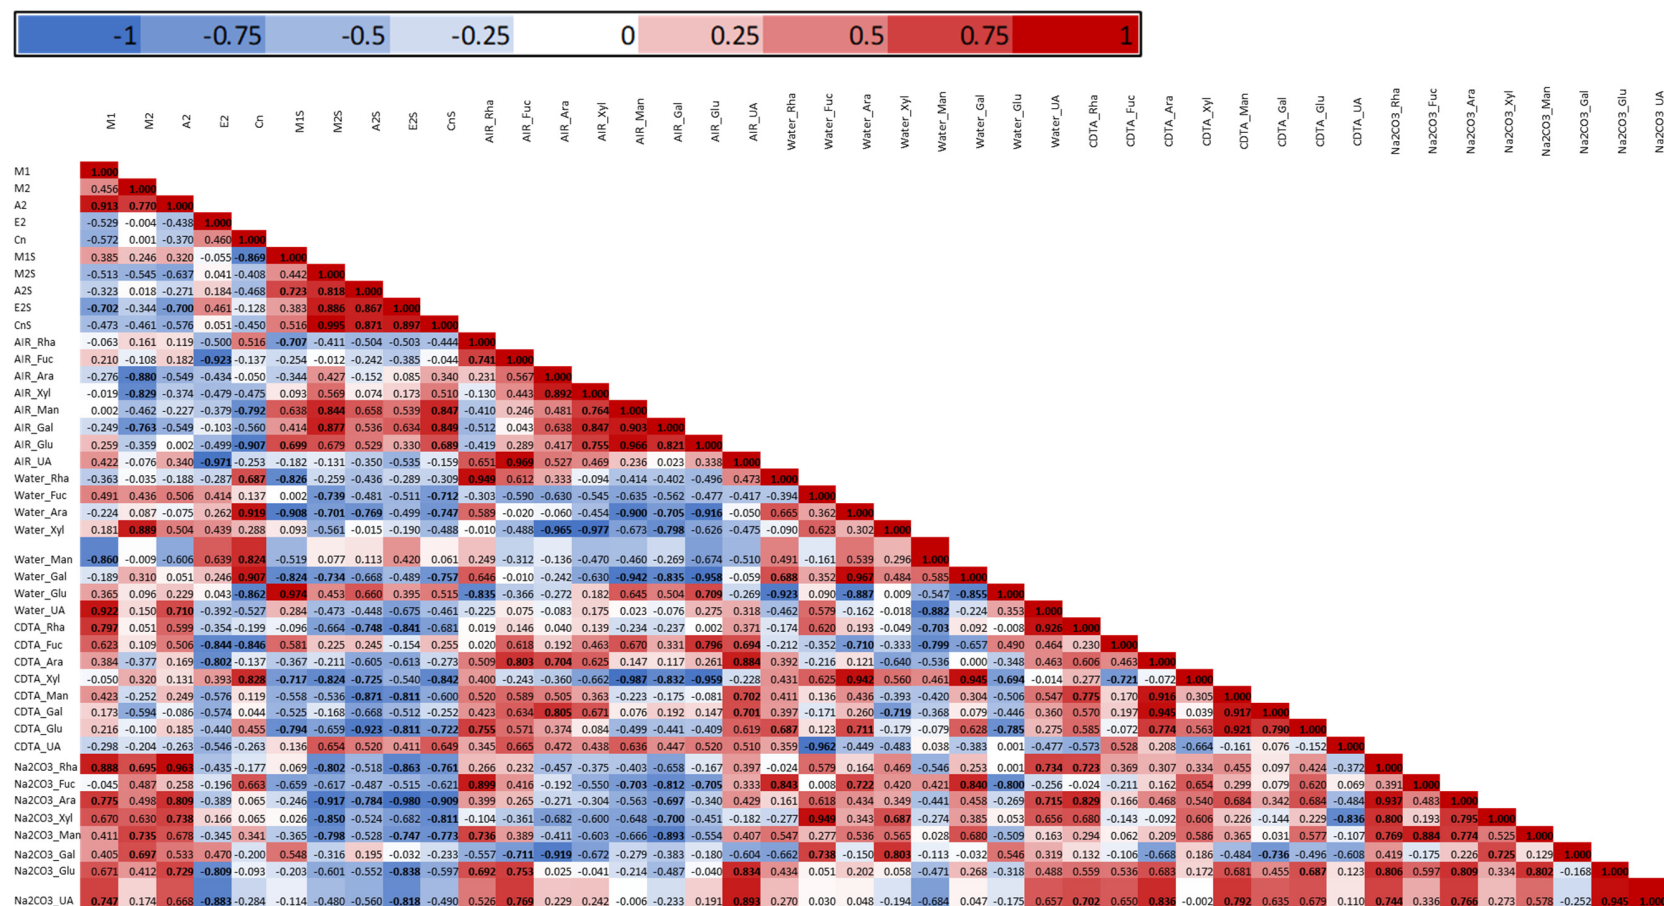

Supplement: s1 [file s1]
