# Supplementary material for: A Comparative Study of Five Apple Cultivars Linking Biochemical Changes at Different Developmental Stages with Storage Textural Quality
Source: MDPI journal article supplement (doi:10.3390/horticulturae10040379), 2024-04-09
Supplement: s1 [file s1]

Archive with 8 entries (8 files):
- Figure S1a.pdf
- Figure S1b.pdf
- Figure S1c.pdf
- Figure S1d.pdf
- Figure S2a.pdf
- Figure S2b.pdf
- Figure S2c.pdf
- Figure S2d.pdf
