# Supplementary figures and images for: A Comparative Study of Five Apple Cultivars Linking Biochemical Changes at Different Developmental Stages with Storage Textural Quality
Source: MDPI journal article supplement (doi:10.3390/horticulturae10040379), 2024-04-09

*Pearson correlation heat map scale*

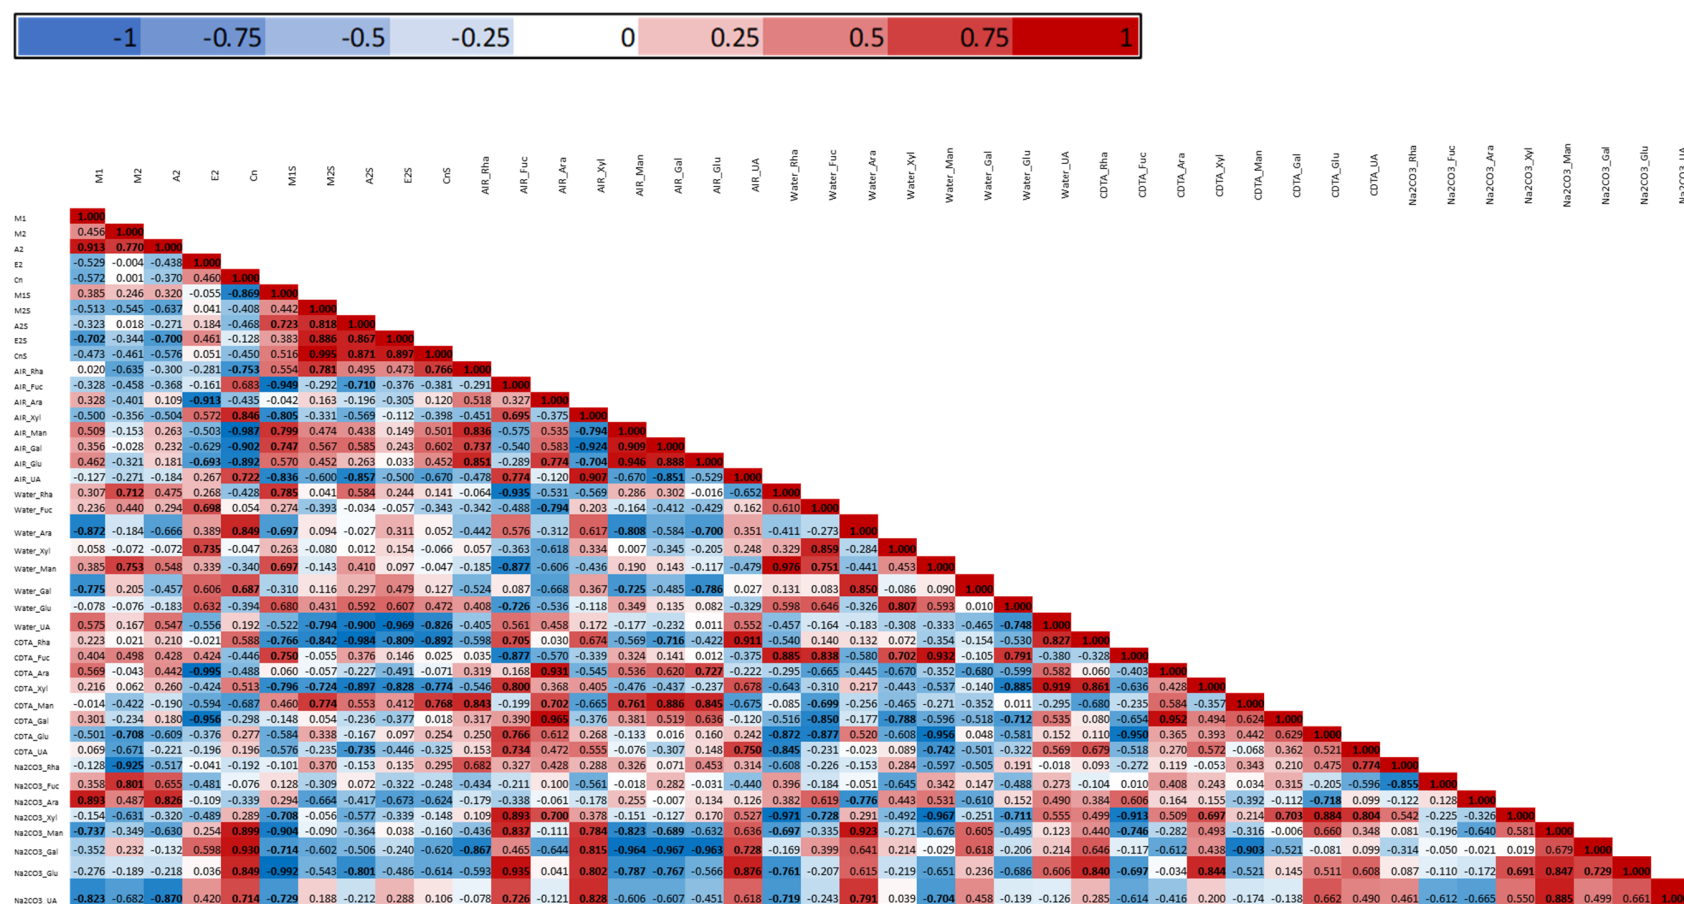

Supplement: s1 [file s1]

*Pearson correlation heat map scale*

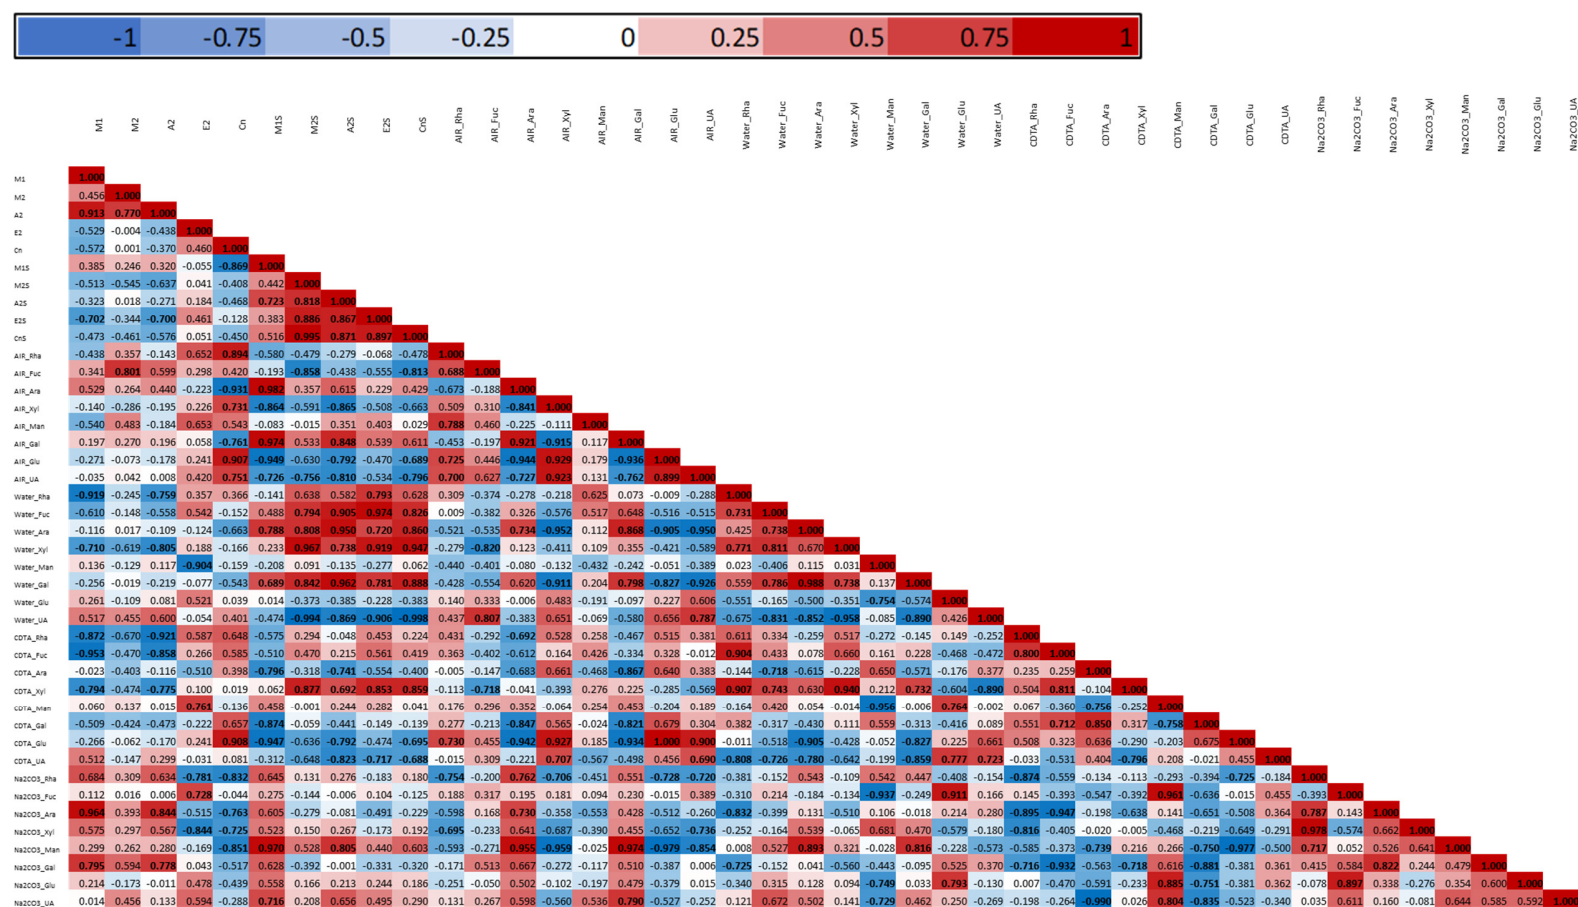

Supplement: s1 [file s1]

*Pearson correlation heat map scale*

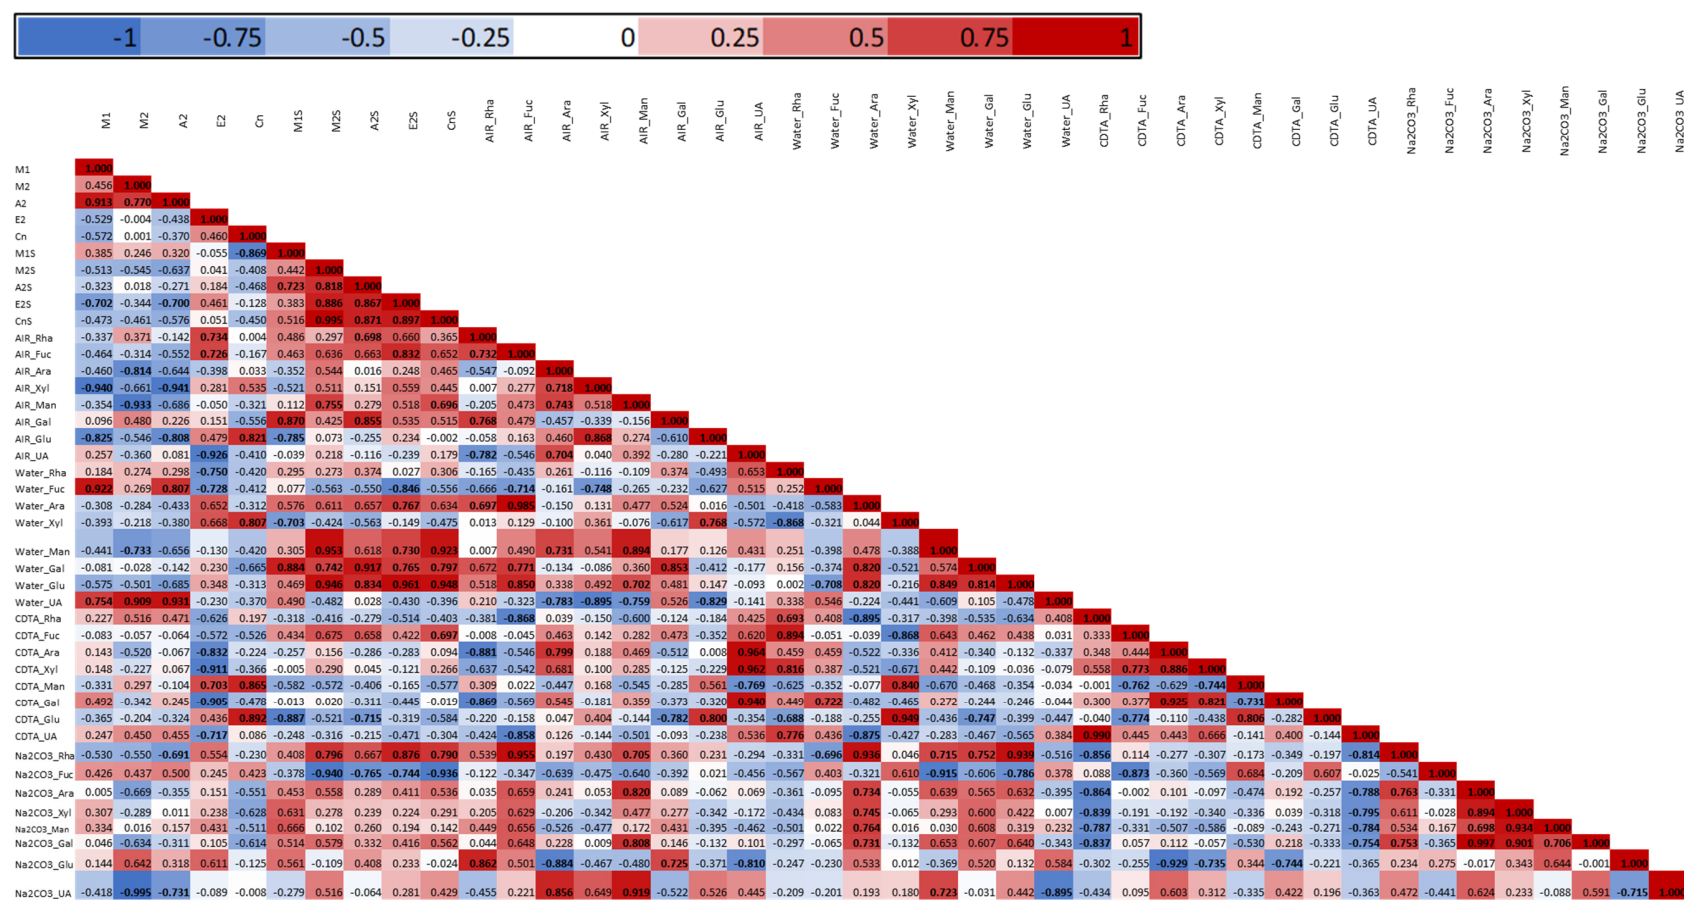

Supplement: s1 [file s1 › Figure S2a.pdf]
